# Supplementary material for: Investigations of the Density and Solubility of Ammonium Perrhenate and Potassium Perrhenate Aqueous Solutions
Source: MDPI journal article supplement (doi:10.3390/ma16155481), 2023-08-05
Supplement: s1 [file s1]

---

## Supplementary Materials

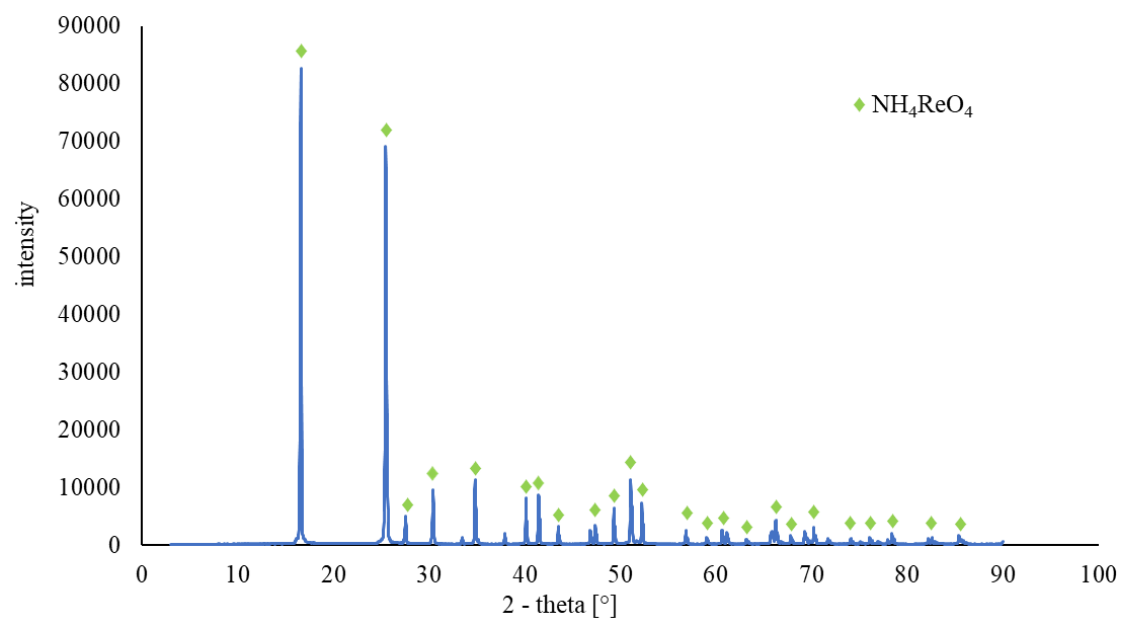

**Figure S1.** XRD analysis of  $\text{NH}_4\text{ReO}_4$ .

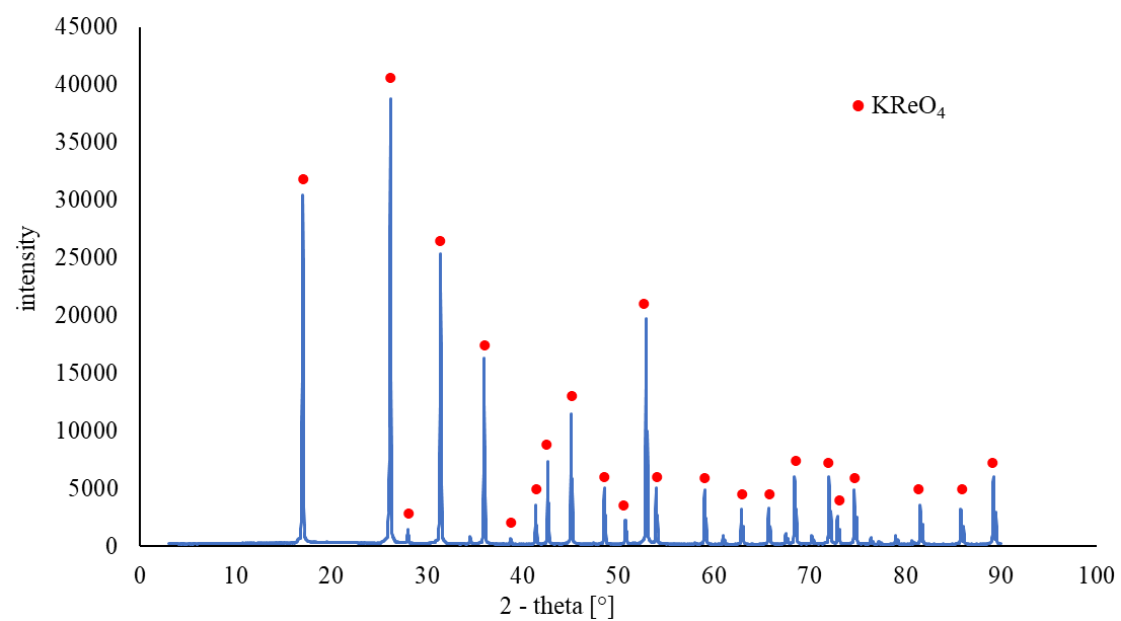

**Figure S2.** XRD analysis of  $\text{KReO}_4$ .

---

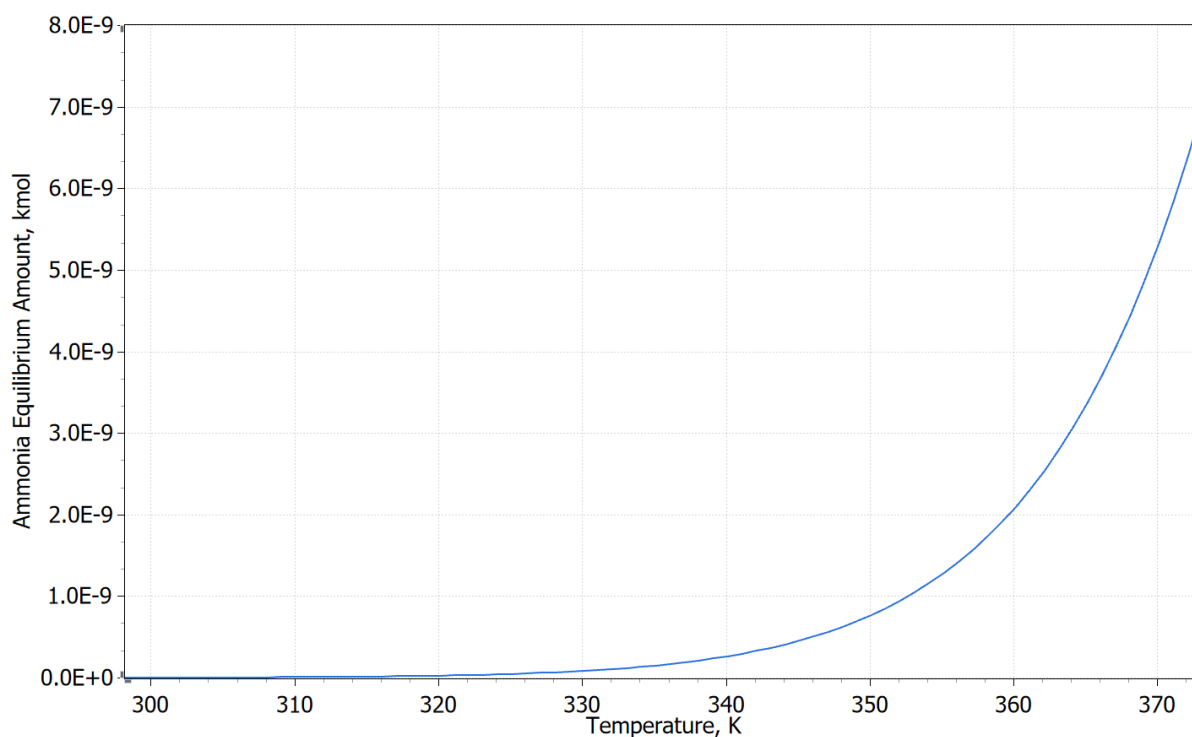

**Figure S3.** Equilibrium amount of ammonia evolved from saturated  $\text{NH}_4\text{ReO}_4$  aqueous solution vs. temperature (HSC Chemistry 9.6.1, Gem module).

**Table S1.** Solubility of  $\text{NH}_4\text{ReO}_4$ .

| Temperature [K] | Literature [52]                |        | Experimental                   |        | STD    | Calculated |
|-----------------|--------------------------------|--------|--------------------------------|--------|--------|------------|
|                 | [g/100g $\text{H}_2\text{O}$ ] | [%w/w] | [g/100g $\text{H}_2\text{O}$ ] | [%w/w] | [%w/w] | [%w/w]     |
| 283.15          | 4.40                           | 4.21   | 4.09                           | 3.92   | 0.16   | 4.09       |
| 293.15          | 6.20                           | 5.48   | 6.19                           | 5.83   | 0.07   | 5.71       |
| 303.15          | 8.70                           | 8.00   | 8.51                           | 7.84   | 0.16   | 7.78       |
| 313.15          | 12.00                          | 10.71  | 11.45                          | 10.28  | 0.27   | 10.35      |
| 323.15          | 14.40                          | 12.59  | 15.64                          | 13.53  | 0.30   | 13.49      |
| 333.15          | 20.70                          | 17.15  | 20.85                          | 17.25  | 0.33   | 17.26      |

**Table S2.** Solubility of  $\text{KReO}_4$ .

| Temperature [K] | Literature [52]                |        | Experimental                   |        | STD    | Calculated |
|-----------------|--------------------------------|--------|--------------------------------|--------|--------|------------|
|                 | [g/100g $\text{H}_2\text{O}$ ] | [%w/w] | [g/100g $\text{H}_2\text{O}$ ] | [%w/w] | [%w/w] | [%w/w]     |
| 283.15          | 0.62                           | 0.62   | 0.56                           | 0.55   | 0.07   | 0.61       |
| 293.15          | 1.21                           | 1.20   | 0.99                           | 0.98   | 0.03   | 0.97       |
| 303.15          | 1.47                           | 1.45   | 1.49                           | 1.47   | 0.02   | 1.48       |
| 313.15          | 2.22                           | 2.17   | 2.27                           | 2.22   | 0.02   | 2.19       |
| 323.15          | 3.20                           | 3.10   | 3.29                           | 3.18   | 0.06   | 3.16       |
| 333.15          | 4.58                           | 4.38   | 4.62                           | 4.41   | 0.08   | 4.44       |

**Table S3.**  $\text{NH}_4\text{ReO}_4$  density versus temperature (automatic measurements).

| Saturation temperature [K] |                                          |                                                    |        |                                          |                                                    |        |                                          |                                                    |
|----------------------------|------------------------------------------|----------------------------------------------------|--------|------------------------------------------|----------------------------------------------------|--------|------------------------------------------|----------------------------------------------------|
| 283.15                     |                                          |                                                    | 293.15 |                                          |                                                    | 303.15 |                                          |                                                    |
| T [K]                      | $\rho$ [ $\text{g}\cdot\text{cm}^{-3}$ ] | STD [ $\text{g}\cdot\text{cm}^{-3}$ ] $\cdot 10^4$ | T [K]  | $\rho$ [ $\text{g}\cdot\text{cm}^{-3}$ ] | STD [ $\text{g}\cdot\text{cm}^{-3}$ ] $\cdot 10^4$ | T [K]  | $\rho$ [ $\text{g}\cdot\text{cm}^{-3}$ ] | STD [ $\text{g}\cdot\text{cm}^{-3}$ ] $\cdot 10^4$ |
| 283.15                     | 1.03009                                  | 3.98                                               | 293.15 | 1.04246                                  | 1.43                                               | 303.15 | 1.05765                                  | 9.19                                               |
| 284.15                     | 1.02995                                  | 3.98                                               | 294.15 | 1.04220                                  | 1.43                                               | 304.15 | 1.05728                                  | 9.20                                               |
| 285.15                     | 1.02980                                  | 3.98                                               | 295.15 | 1.04192                                  | 1.43                                               | 305.15 | 1.05690                                  | 9.22                                               |
| 286.15                     | 1.02964                                  | 3.98                                               | 296.15 | 1.04163                                  | 1.40                                               | 306.15 | 1.05651                                  | 9.17                                               |
| 287.15                     | 1.02947                                  | 3.94                                               | 297.15 | 1.04134                                  | 1.40                                               | 307.15 | 1.05612                                  | 9.15                                               |
| 288.15                     | 1.02929                                  | 3.97                                               | 298.15 | 1.04104                                  | 1.40                                               | 308.15 | 1.05572                                  | 9.15                                               |
| 289.15                     | 1.02909                                  | 3.94                                               | 299.15 | 1.04073                                  | 1.42                                               | 309.15 | 1.05531                                  | 9.15                                               |
| 290.15                     | 1.02888                                  | 3.94                                               | 300.15 | 1.04041                                  | 1.40                                               | 310.15 | 1.05489                                  | 9.15                                               |
| 291.15                     | 1.02866                                  | 3.93                                               | 301.15 | 1.04009                                  | 1.43                                               | 311.15 | 1.05446                                  | 9.10                                               |
| 292.15                     | 1.02844                                  | 3.97                                               | 302.15 | 1.03975                                  | 1.43                                               | 312.15 | 1.05403                                  | 9.12                                               |
| 293.15                     | 1.02820                                  | 3.97                                               | 303.15 | 1.03941                                  | 1.43                                               | 313.15 | 1.05359                                  | 9.10                                               |
| 313.15                     |                                          |                                                    | 323.15 |                                          |                                                    | 333.15 |                                          |                                                    |
| T [K]                      | $\rho$ [ $\text{g}\cdot\text{cm}^{-3}$ ] | STD [ $\text{g}\cdot\text{cm}^{-3}$ ] $\cdot 10^4$ | T [K]  | $\rho$ [ $\text{g}\cdot\text{cm}^{-3}$ ] | STD [ $\text{g}\cdot\text{cm}^{-3}$ ] $\cdot 10^4$ | T [K]  | $\rho$ [ $\text{g}\cdot\text{cm}^{-3}$ ] | STD [ $\text{g}\cdot\text{cm}^{-3}$ ] $\cdot 10^4$ |
| 313.15                     | 1.07816                                  | 0.55                                               | 323.15 | 1.10092                                  | 2.30                                               | 333.15 | 1.12938                                  | 4.25                                               |
| 314.15                     | 1.07768                                  | 0.60                                               | 324.15 | 1.10032                                  | 2.05                                               | 334.15 | 1.12786                                  | 12.55                                              |
| 315.15                     | 1.07720                                  | 0.50                                               | 325.15 | 1.09938                                  | 2.60                                               | 335.15 | 1.12543                                  | 25.60                                              |
| 316.15                     | 1.07670                                  | 0.30                                               | 326.15 | 1.09808                                  | 4.05                                               | 336.15 | 1.12291                                  | 30.75                                              |
| 317.15                     | 1.07617                                  | 0.10                                               | 327.15 | 1.09652                                  | 6.40                                               | 337.15 | 1.12044                                  | 32.85                                              |
| 318.15                     | 1.07562                                  | 0.65                                               | 328.15 | 1.09497                                  | 7.55                                               | 338.15 | 1.11814                                  | 33.25                                              |
| 319.15                     | 1.07504                                  | 1.40                                               | 329.15 | 1.09331                                  | 9.65                                               | 339.15 | 1.11617                                  | 33.00                                              |
| 320.15                     | 1.07444                                  | 2.25                                               | 330.15 | 1.09183                                  | 10.80                                              | 340.15 | 1.11433                                  | 32.00                                              |
| 321.15                     | 1.07382                                  | 3.25                                               | 331.15 | 1.09043                                  | 11.65                                              | 341.15 | 1.11266                                  | 31.50                                              |
| 322.15                     | 1.07317                                  | 4.30                                               | 332.15 | 1.08911                                  | 12.30                                              | 342.15 | 1.11111                                  | 31.65                                              |
| 323.15                     | 1.07251                                  | 5.35                                               | 333.15 | 1.08786                                  | 12.80                                              | 343.15 | 1.10969                                  | 31.30                                              |

**Table S4.**  $\text{NH}_4\text{ReO}_4$  density versus temperature (manual measurements).

| Saturation temperature |                                          |                                                    |        |                                          |                                                    |
|------------------------|------------------------------------------|----------------------------------------------------|--------|------------------------------------------|----------------------------------------------------|
| 323.15                 |                                          |                                                    | 333.15 |                                          |                                                    |
| T [K]                  | $\rho$ [ $\text{g}\cdot\text{cm}^{-3}$ ] | STD [ $\text{g}\cdot\text{cm}^{-3}$ ] $\cdot 10^4$ | T [K]  | $\rho$ [ $\text{g}\cdot\text{cm}^{-3}$ ] | STD [ $\text{g}\cdot\text{cm}^{-3}$ ] $\cdot 10^4$ |
| 323.15                 | 1.10233                                  | 2.74                                               | 333.15 | 1.12943                                  | 3.61                                               |
| 324.15                 | 1.10201                                  | 4.00                                               | 334.15 | 1.12895                                  | 5.34                                               |
| 325.15                 | 1.10136                                  | 2.74                                               | 335.15 | 1.12855                                  | 9.31                                               |
| 326.15                 | 1.10030                                  | 5.10                                               | 336.15 | 1.12757                                  | 122                                                |
| 327.15                 | 1.09989                                  | 3.91                                               | 337.15 | 1.12712                                  | 8.70                                               |
| 328.15                 | 1.09925                                  | 77.9                                               | 338.15 | 1.12601                                  | 5310                                               |
| 329.15                 | 1.09882                                  | 94.2                                               | 339.15 | 1.12533                                  | 109                                                |
| 330.15                 | 1.09763                                  | 5.33                                               | 340.15 | 1.12479                                  | 7.43                                               |
| 331.15                 | 1.09642                                  | 5.11                                               | 341.15 | 1.12398                                  | 112                                                |
| 332.15                 | 1.09685                                  | 2.64                                               | 342.15 | 1.12281                                  | 116                                                |
| 333.15                 | 1.09554                                  | 2.30                                               | 343.15 | 1.12252                                  | 104                                                |

Table S5. KReO<sub>4</sub> density versus temperature.

| Saturation temperature [K] |                              |                                                |        |                              |                                                |        |                              |                                                |
|----------------------------|------------------------------|------------------------------------------------|--------|------------------------------|------------------------------------------------|--------|------------------------------|------------------------------------------------|
| 283.15                     |                              |                                                | 293.15 |                              |                                                | 303.15 |                              |                                                |
| T [K]                      | $\rho$ [g·cm <sup>-3</sup> ] | STD<br>[g·cm <sup>-3</sup> ] · 10 <sup>5</sup> | T [K]  | $\rho$ [g·cm <sup>-3</sup> ] | STD<br>[g·cm <sup>-3</sup> ] · 10 <sup>5</sup> | T [K]  | $\rho$ [g·cm <sup>-3</sup> ] | STD<br>[g·cm <sup>-3</sup> ] · 10 <sup>5</sup> |
| 283.15                     | 1.00479                      | 3.27                                           | 293.15 | 1.00601                      | 7.32                                           | 303.15 | 1.00759                      | 9.88                                           |
| 284.15                     | 1.00469                      | 3.27                                           | 294.15 | 1.00579                      | 7.32                                           | 304.15 | 1.00727                      | 9.88                                           |
| 285.15                     | 1.00457                      | 3.68                                           | 295.15 | 1.00556                      | 7.32                                           | 305.15 | 1.00694                      | 9.88                                           |
| 286.15                     | 1.00445                      | 3.27                                           | 296.15 | 1.00532                      | 7.32                                           | 306.15 | 1.00660                      | 10.20                                          |
| 287.15                     | 1.00431                      | 3.27                                           | 297.15 | 1.00507                      | 7.32                                           | 307.15 | 1.00626                      | 9.88                                           |
| 288.15                     | 1.00416                      | 3.27                                           | 298.15 | 1.00481                      | 7.32                                           | 308.15 | 1.00591                      | 9.42                                           |
| 289.15                     | 1.00400                      | 3.3                                            | 299.15 | 1.00454                      | 7.32                                           | 309.15 | 1.00555                      | 9.42                                           |
| 290.15                     | 1.00383                      | 3.3                                            | 300.15 | 1.00426                      | 7.32                                           | 310.15 | 1.00518                      | 9.42                                           |
| 291.15                     | 1.00364                      | 3.27                                           | 301.15 | 1.00398                      | 7.59                                           | 311.15 | 1.00481                      | 9.42                                           |
| 292.15                     | 1.00344                      | 3.68                                           | 302.15 | 1.00368                      | 7.79                                           | 312.15 | 1.00442                      | 9.57                                           |
| 293.15                     | 1.00324                      | 3.3                                            | 303.15 | 1.00338                      | 7.54                                           | 313.15 | 1.00404                      | 9.88                                           |
| 313.15                     |                              |                                                | 323.15 |                              |                                                | 333.15 |                              |                                                |
| T [K]                      | $\rho$ [g·cm <sup>-3</sup> ] | STD<br>[g·cm <sup>-3</sup> ] · 10 <sup>5</sup> | T [K]  | $\rho$ [g·cm <sup>-3</sup> ] | STD<br>[g·cm <sup>-3</sup> ] · 10 <sup>5</sup> | T [K]  | $\rho$ [g·cm <sup>-3</sup> ] | STD<br>[g·cm <sup>-3</sup> ] · 10 <sup>5</sup> |
| 313.15                     | 1.00978                      | 9.46                                           | 323.15 | 1.01332                      | 10.40                                          | 333.15 | 1.01865                      | 5.79                                           |
| 314.15                     | 1.00938                      | 9.09                                           | 324.15 | 1.01284                      | 10.14                                          | 334.15 | 1.01810                      | 5.73                                           |
| 315.15                     | 1.00897                      | 9.09                                           | 325.15 | 1.01236                      | 10.40                                          | 335.15 | 1.01752                      | 4.92                                           |
| 316.15                     | 1.00856                      | 8.73                                           | 326.15 | 1.01186                      | 10.14                                          | 336.15 | 1.01692                      | 5.25                                           |
| 317.15                     | 1.00813                      | 9.09                                           | 327.15 | 1.01137                      | 10.40                                          | 337.15 | 1.01630                      | 7.76                                           |
| 318.15                     | 1.00770                      | 9.09                                           | 328.15 | 1.01086                      | 10.61                                          | 338.15 | 1.01567                      | 10.87                                          |
| 319.15                     | 1.00726                      | 9.09                                           | 329.15 | 1.01035                      | 10.21                                          | 339.15 | 1.01504                      | 14.84                                          |
| 320.15                     | 1.00682                      | 8.73                                           | 330.15 | 1.00983                      | 10.21                                          | 340.15 | 1.01439                      | 18.67                                          |
| 321.15                     | 1.00637                      | 8.73                                           | 331.15 | 1.00931                      | 10.21                                          | 341.15 | 1.01374                      | 22.40                                          |
| 322.15                     | 1.00591                      | 9.09                                           | 332.15 | 1.00878                      | 10.21                                          | 342.15 | 1.01308                      | 26.13                                          |
| 323.15                     | 1.00544                      | 9.09                                           | 333.15 | 1.00825                      | 10.03                                          | 343.15 | 1.01243                      | 28.47                                          |
